# Supplementary material
Source: publisher site journal article supplement (https://spandidos-publications.com/1800/downloadSupplementary)

Figure S1. ELISA analysis of the effect of dexamethasone on the expression levels of IL-10 in the AFP-positive and AFP-negative HCC groups. The OD values for IL-10 were assessed following 48 h of incubation with 3, 7 or 10  $\mu\text{mol/l}$  dexamethasone. \* $P < 0.05$  vs. AFP-negative HCC samples. OD, optical density; AFP,  $\alpha$ -fetoprotein; NHCC, non-hepatocellular carcinoma; HCC, hepatocellular carcinoma; IL, interleukin.

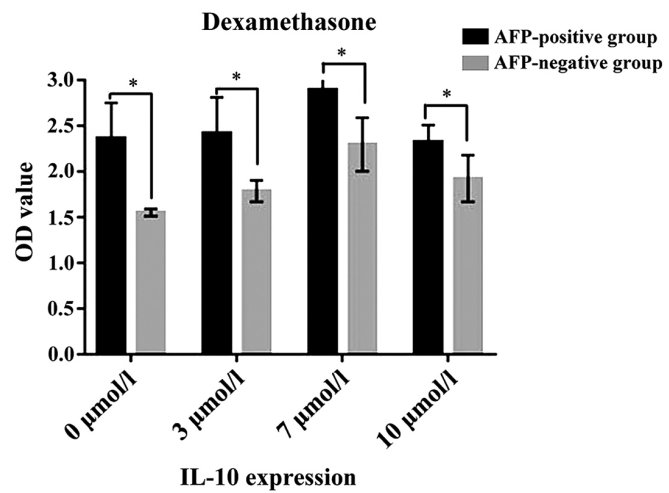

Figure S2. ELISA analysis of the effect of RU486 on the expression levels of IL-10 in the AFP-positive and AFP-negative HCC groups. The OD values for IL-10 were monitored following 48 h of incubation with 3, 7 or 10  $\mu\text{mol/l}$  RU486. \* $P < 0.05$  vs. 0  $\mu\text{l/l}$  treated group. OD, optical density; IL, interleukin.

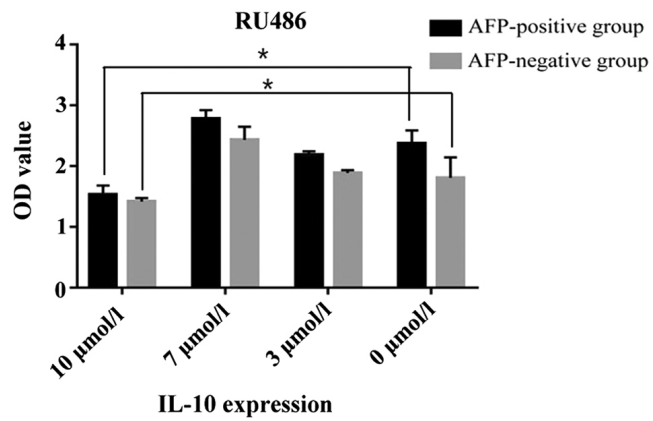

Supplement: Supplementary file 1 [file downloadSupplementary]
